# Supplementary material for: Evidence for deliberate burial of the dead by Homo naledi
Source: eLife. 2025 Sep 1;12:RP89106. doi: 10.7554/eLife.89106 (PMC12401548; doi:10.7554/eLife.89106)
Supplement: Supplementary file 1. [file elife-89106-supp1.xlsx]

## Sheet: Sheet 1
Samples	Li (mg/kg)	Be (mg/kg)	Sc (mg/kg)	Ti (mg/kg)	V (mg/kg)	Cr (mg/kg)	Co (mg/kg)	Ni (mg/kg)	Cu (mg/kg)	Zn (mg/kg)	Ga (mg/kg)	Ge (mg/kg)	As (mg/kg)	Se (mg/kg)	Rb (mg/kg)	Sr (mg/kg)	Y (mg/kg)	Zr (mg/kg)	Nb (mg/kg)	Cd (mg/kg)	Sn (mg/kg)	Sb (mg/kg)	Cs (mg/kg)	Ba (mg/kg)	La (mg/kg)	Ce (mg/kg)	Pr (mg/kg)	Nd (mg/kg)	Sm (mg/kg)	Eu (mg/kg)	Gd (mg/kg)	Tb (mg/kg)	Dy (mg/kg)	Ho (mg/kg)	Er (mg/kg)	Tm (mg/kg)	Yb (mg/kg)	Lu (mg/kg)	Hf (mg/kg)	Ta (mg/kg)	W (mg/kg)	Tl (mg/kg)	Pb (mg/kg)	Bi (mg/kg)	Th (mg/kg)	U (mg/kg)
DF1	62.7239	4.97593	13.7206	2857.59	29.8204	71.3333	17.3416	78.8878	66.3919	122.225	19.4195	1.07455	1.88911	0.244992	65.8141	67.2514	24.1363	81.3827	7.91834	0.708016	2.1352	0.816593	5.86816	641.332	28.3411	47.8162	6.87797	26.1089	5.51752	1.42735	5.13243	0.743165	4.67812	0.947313	2.57493	0.361486	2.37445	0.343469	2.42288	0.609046	0.323437	0.603836	12.2933	0.187824	9.28154	1.82517
DF3	97.3076	3.64	24.6893	6752.72	125.06	190.014	13.8995	59.8108	40.7329	66.5299	12.9199	1.48394	5.50556	0.245172	114.509	41.1961	19.5419	177.9	19.6684	0.0242365	4.29262	0.927969	12.2404	337.189	24.1916	71.5091	4.33931	14.0301	2.78572	0.576245	2.56448	0.465637	3.05806	0.664115	2.04404	0.308909	2.28448	0.340462	5.04096	1.58172	3.58665	0.83752	16.782	0.530734	18.6271	2.64842
DF5	66.5806	4.5541	13.2129	2671.05	27.5613	58.3044	19.1578	65.7811	63.8004	135.048	15.9141	1.16826	1.92244	0.227986	63.9567	60.056	32.0309	75.2816	7.00255	0.394185	1.92831	0.837977	6.46664	507.667	27.8993	44.35	7.22274	27.4636	5.84244	1.45201	5.63605	0.846098	5.21162	1.10519	3.06121	0.419342	2.82658	0.414741	2.28428	0.52659	0.272792	0.52518	12.3557	0.234988	8.65681	1.57696
DF7	93.914	4.63413	21.6055	4339.39	50.6815	106.036	22.3709	86.5056	88.9578	151.7	15.3797	1.40171	2.19309	0.159163	95.0445	64.4228	29.4497	121.141	11.946	0.498877	3.21637	0.923581	9.76913	510.603	31.4497	59.0173	6.97705	24.9649	5.1824	1.26365	4.93503	0.755539	4.4547	0.948839	2.70327	0.379551	2.61306	0.398765	3.54616	0.941234	0.164804	0.62849	19.2086	0.358175	15.0515	2.47758
DF9	54.0535	1.39972	9.38717	2707.41	55.6825	88.0116	19.6037	65.7731	65.5108	122.418	10.3729	1.04878	3.30337	0.155419	48.5255	47.395	16.6295	79.7244	7.13379	0.0226211	1.36668	0.419703	5.32053	334.082	19.6878	43.3266	4.54437	16.5337	3.3288	0.745573	3.03478	0.457634	2.76761	0.582285	1.56988	0.222816	1.55712	0.229616	2.31689	0.514449	1.15907	0.452148	14.7463	0.186016	6.26013	1.41348
DF11	71.002	2.05298	12.2694	3302.62	65.667	104.883	20.7593	66.8121	84.4481	137.364	10.4071	1.15169	3.98612	0.107922	64.042	36.9579	21.7193	96.0538	9.08366	0.26706	1.7183	0.547312	7.08376	329.922	23.7244	48.4753	5.69819	20.2178	3.97834	0.960338	3.85808	0.592361	3.58626	0.741755	2.06932	0.284422	2.01297	0.301202	2.77195	0.654228	1.49618	0.520156	15.4967	0.266037	8.17597	1.46761
DF13	61.6335	2.42806	11.8559	2891.16	67.4132	102.006	19.7358	69.9033	70.2544	112.967	12.357	1.14659	4.56123	0.128196	66.5352	41.4849	19.5175	89.7014	8.0782	0.545709	1.88953	0.50888	6.31197	391.842	22.0828	47.2184	5.10937	18.3955	3.7655	0.877189	3.43548	0.534706	3.34854	0.669375	1.8632	0.279091	1.84924	0.262594	2.58465	0.606978	1.69437	0.615576	16.3624	0.498826	8.0521	1.54219
DF15	71.9959	4.84419	17.9444	3892.83	59.8902	111.775	21.845	79.7167	91.6612	168.753	13.7472	1.27702	3.95943	0.185927	85.4893	65.1588	23.0532	112.46	11.0911	0.849695	3.10124	0.880382	7.4648	456.588	28.4353	58.0382	6.46247	23.2703	4.82609	1.05762	4.11602	0.641406	3.78578	0.769326	2.20845	0.329449	2.17592	0.323927	3.30039	0.896053	0.136672	0.600273	24.2036	0.526441	14.0989	2.53851
SA1	195.19	2.82453	22.2715	5582.73	116.097	179.881	31.243	86.3901	70.1801	70.5641	12.9238	1.83426	7.20429	0.236899	100.443	28.5895	22.454	156.679	16.7357	0.132906	3.45292	0.897982	11.3351	354.336	44.9672	86.137	10.6844	37.5515	7.36329	1.54521	5.74079	0.865734	5.07117	0.958801	2.76645	0.384565	2.72999	0.413033	4.64472	1.29775	2.35164	0.781967	23.3696	0.414556	16.9751	2.28198
SA2	54.8297	3.03247	11.8103	2180.48	25.295	63.5536	12.3041	62.1521	57.5601	158.937	13.6065	1.11253	1.49495	0.151015	65.8566	56.5617	21.7148	73.6353	5.83816	0.704992	1.81166	0.577087	5.79749	417.649	21.4974	39.167	5.13774	19.0445	3.97231	0.967855	3.69131	0.543574	3.40339	0.708643	2.00156	0.276011	1.90721	0.269406	2.13167	0.423315	0.195988	0.526088	2.88727	0.15592	7.99635	1.46059
SA3	151.79	4.03281	17.3043	4936.23	74.0039	138.72	26.2451	89.0541	50.8332	71.607	14.0407	1.53326	3.47609	0.194765	83.0391	37.3964	19.7304	137.224	14.1999	0.119535	2.70473	0.761849	10.4824	430.994	33.2971	74.6412	7.05996	24.2672	4.53938	0.997934	3.7958	0.580477	3.59457	0.702966	2.13142	0.313279	2.08905	0.320383	4.10438	1.06566	1.22896	0.596922	19.9055	0.282873	13.7923	1.7858
SA4	31.7283	3.21793	7.32105	879.794	11.9882	27.5826	8.75916	46.6759	48.4758	93.3979	12.8354	0.812606	1.58458	0.139273	46.2687	82.2375	22.3129	42.1833	2.17339	0.679373	1.06763	0.385155	3.4678	413.424	16.7987	28.9358	4.59923	18.1368	3.86303	0.990859	3.83841	0.564598	3.47961	0.748094	2.05503	0.289117	1.82742	0.287384	1.20346	0.128882	0.057818	0.359943	1.06798	0.0663412	4.98995	1.16074
SA5	41.4578	3.95542	9.11645	1126.62	10.969	35.9883	11.9117	61.9365	66.127	141.614	15.2663	0.998449	1.25795	0.289582	58.778	64.3683	26.4439	53.6636	2.57478	0.89299	1.35848	0.41112	4.58349	489.508	19.2981	33.9552	5.45263	22.1871	4.56632	1.28545	4.75297	0.714066	4.36266	0.906761	2.43235	0.327771	2.26292	0.321276	1.52487	0.155767	0.0895394	0.422557	2.25694	0.168502	5.96546	1.38869
SA6	121.895	4.91262	17.939	4172.23	43.4447	109.368	25.0388	96.3467	75.1793	131.027	16.5297	1.2977	2.80056	0.226958	88.7361	49.2827	25.8457	110.112	11.3231	0.725485	2.44846	0.815934	10.072	522.151	33.8571	63.2806	7.8743	28.4309	5.60152	1.3759	4.97843	0.777236	4.56972	0.946199	2.608	0.362016	2.42611	0.365766	3.2667	0.840055	0.476961	0.650735	18.4301	0.398214	12.3297	1.78272
SA7	163.016	4.95396	21.1781	5605.44	65.6649	141.74	30.988	104.834	64.7523	106.218	19.9923	1.69003	2.86112	0.223959	119.565	49.9341	28.5056	143.739	15.3384	0.356797	3.03587	0.894674	12.9331	607.198	43.6674	82.8686	9.9226	34.134	6.6586	1.53863	5.74629	0.850389	5.22728	1.05877	2.87497	0.401409	2.80044	0.410879	4.22282	1.10293	0.395897	0.787075	22.8136	0.350784	15.3583	2.192
SA8	101.94	5.29586	22.7692	4559.94	50.9716	122.461	21.9915	90.9494	70.7505	111.101	19.8117	1.46645	2.86661	0.206693	107.488	58.2162	27.2014	130.944	12.7652	0.531898	3.20318	0.958838	10.3608	593.438	34.3999	65.0095	7.29974	25.8218	5.31722	1.29878	4.97184	0.760875	4.92221	1.02809	2.87845	0.431945	2.88943	0.417914	4.05974	1.00291	0.382691	0.767533	18.5942	0.318309	15.764	2.5929
SB1	100.004	4.53778	19.7413	3566.22	54.2098	111.358	17.5792	93.5427	100.642	214.493	18.8653	1.4924	3.6254	0.340462	95.9899	71.0856	41.2195	115.864	10.2165	0.585226	2.97607	0.90768	10.4984	568.509	36.875	66.5621	8.49487	31.2764	6.46504	1.54159	6.11178	0.931655	5.76964	1.19955	3.37237	0.470791	3.17489	0.458733	3.34139	0.747763	0.15183	0.602075	11.8124	0.266938	13.0385	2.16097
SB2	99.6311	4.78114	20.1855	3328.53	49.9052	107.871	15.4092	96.1763	113.823	277.272	19.8754	1.56233	2.66651	0.301261	81.4299	65.728	39.0902	117.591	9.3148	0.812893	2.88692	0.999354	9.56473	599.114	33.8044	65.2792	8.11193	30.1123	6.80282	1.54936	5.99842	0.9443	5.6197	1.16327	3.31532	0.486197	3.10894	0.455736	3.45801	0.659602	0.0800001	0.554354	10.4789	0.263528	11.9414	2.11519
SB3	104.72	4.8643	21.2781	3735.89	48.1479	112.941	18.6868	96.775	107.98	228.945	20.7586	1.63467	3.18122	0.313517	101.021	62.4877	38.8891	117.821	10.7039	0.844028	3.12251	1.02031	10.7326	625.838	37.5239	67.5556	8.70748	31.8702	6.60676	1.63199	6.18711	0.926973	5.6649	1.21411	3.2616	0.470766	3.10629	0.467672	3.51547	0.780613	0.100461	0.716327	9.21717	0.220877	13.4227	2.056
SC1	95.3262	4.86503	20.1283	3390.27	51.1425	103.45	17.908	92.1215	91.2908	157.331	19.4633	1.57408	2.51145	0.317917	103.273	74.2555	36.5847	117.857	9.8969	0.652412	3.21589	0.947771	10.8488	584.787	37.7443	66.1273	8.6479	31.69	6.50005	1.59531	6.18801	0.925758	5.5309	1.17688	3.27592	0.465526	3.08025	0.451056	3.5089	0.678665	0.222504	0.590909	9.54099	0.181347	13.5986	2.22735
SC2	99.1578	5.25491	21.1792	3778.99	55.0765	113.738	18.853	96.5618	92.7652	173.661	19.5517	1.64503	3.84283	0.460818	105.411	68.5775	36.895	122.286	10.9032	0.623675	3.30087	0.984033	11.0607	586.859	37.1837	66.0631	8.38759	30.7165	6.39855	1.48332	5.92396	0.895721	5.49035	1.1424	3.21924	0.462541	3.08842	0.453439	3.56048	0.792842	0.17156	0.698302	10.8983	0.269246	13.9323	2.1941
SC3	90.8835	4.58742	20.0255	3415.78	49.3533	105.19	17.7942	85.0393	80.206	144.03	17.1606	1.5826	2.59611	0.280268	96.024	62.8636	31.7195	111.828	9.8732	0.51565	3.02282	0.874552	10.0984	514.457	32.9738	62.2196	7.52967	27.3358	5.58109	1.34495	5.24573	0.799984	5.0086	1.01838	2.87169	0.409674	2.7499	0.408512	3.37601	0.732235	0.0855444	0.632899	11.7034	0.279466	13.3041	2.08231
SC4	104.654	4.77465	23.1585	4185.46	58.5369	129.867	19.506	95.7722	82.2544	153.673	19.7477	1.54384	2.5148	0.315663	114.85	59.5655	32.7428	131.976	11.9374	0.646413	3.50774	1.06278	11.8614	578.357	38.1155	71.2184	8.3568	30.2597	6.13625	1.42319	5.47971	0.8575	5.20242	1.0707	2.98121	0.429116	2.89165	0.419415	3.85844	0.862607	0.363833	0.744869	11.0881	0.263392	15.3349	2.2574
SE1	109.201	1.64389	9.57054	2845.81	51.6736	82.8491	15.1687	53.8137	40.6699	46.7465	6.92982	1.10498	2.51249	0.150227	48.1034	36.0867	12.5967	76.0074	10.5362	0.203988	1.32755	0.349858	5.90952	220.341	20.2863	40.0028	4.86327	17.0499	3.28847	0.772339	2.87723	0.435949	2.46534	0.485165	1.36078	0.198266	1.34266	0.189877	2.16915	0.598861	0.605292	0.360179	12.1768	0.185808	7.34432	1.16106
SE2	141.882	1.92989	11.8423	3374.12	51.1684	99.5026	17.8009	65.7795	48.6519	55.5547	7.19193	1.03393	2.49754	0.27124	56.2117	30.4505	16.8653	92.4998	9.3342	0.180272	1.62157	0.476613	7.42353	231.229	25.3918	49.6331	6.18373	22.1515	4.45058	1.01655	3.80032	0.571562	3.33986	0.657118	1.71035	0.257941	1.77294	0.24915	2.56191	0.67488	0.469963	0.447608	13.6415	0.183266	8.74354	1.4029
SE3	2.2424	1.10972	3.09946	30.6722	15.3978	4.91767	3.63632	6.82876	12.6931	12.9716	1.91447	0.205224	0.944381	0.132887	2.13612	73.7969	7.03424	0.952601	0.0851767	0.263807	0.169639	0.24789	0.274518	65.7022	4.79702	8.17632	1.51944	6.22859	1.63873	0.493534	1.69247	0.254122	1.41523	0.272019	0.604532	0.0724342	0.478903	0.059179	0.0239516	0.010752	0.00202717	0.0253402	1.32634	0.239198	0.254885	0.396226
SE4	48.3385	2.79002	9.83577	1973.73	28.189	58.1856	12.4857	56.6862	46.0563	75.9877	12.0747	0.848484	1.95712	0.242953	44.3715	44.1336	17.2088	55.6986	5.54076	0.37796	1.50425	0.572667	4.55472	408.447	18.9789	32.4741	4.59728	16.8494	3.52418	0.867676	3.19967	0.487143	2.95832	0.587543	1.65776	0.231087	1.55137	0.226511	1.62905	0.453135	0.387403	0.352495	9.89287	0.220182	6.36768	1.20712
SE5	36.179	2.66823	8.62615	1815.31	24.0698	47.7973	10.3536	45.5004	49.4057	88.911	11.2832	0.67099	1.42568	0.165347	37.6965	54.7286	15.4858	52.4732	5.05382	0.576116	1.54855	0.443893	3.18025	376.964	15.3356	29.6661	3.67139	13.9295	3.02885	0.782667	2.79095	0.428587	2.56965	0.547386	1.51812	0.209975	1.43064	0.200682	1.55585	0.392189	0.165351	0.335659	8.25169	0.137259	5.54319	1.29935
FS2280	126.713	4.95605	18.5508	3921.23	30.7785	78.1093	9.3434	149.23	175.199	547.54	35.1085	1.51209	1.83041	0.349235	98.4601	99.3829	41.61	114.005	10.1077	1.91766	2.33257	0.87412	10.2286	1227.82	41.0747	74.8642	9.11938	32.9845	6.69419	1.62609	6.27785	0.960167	5.87267	1.25256	3.5342	0.485731	3.31501	0.475084	3.372	0.812249	0.0266258	0.475776	13.0254	0.258117	12.8882	2.0679
